# Supplementary material for: ANOSPEX: A Stochastic, Spatially Explicit Model for Studying Anopheles Metapopulation Dynamics
Source: PubMed Central journal article supplement (PMC3704604; doi:10.1371/journal.pone.0068040), 2013-07-08
Supplement: pone.0068040.s002.pdf [file pone.0068040.s002.pdf]

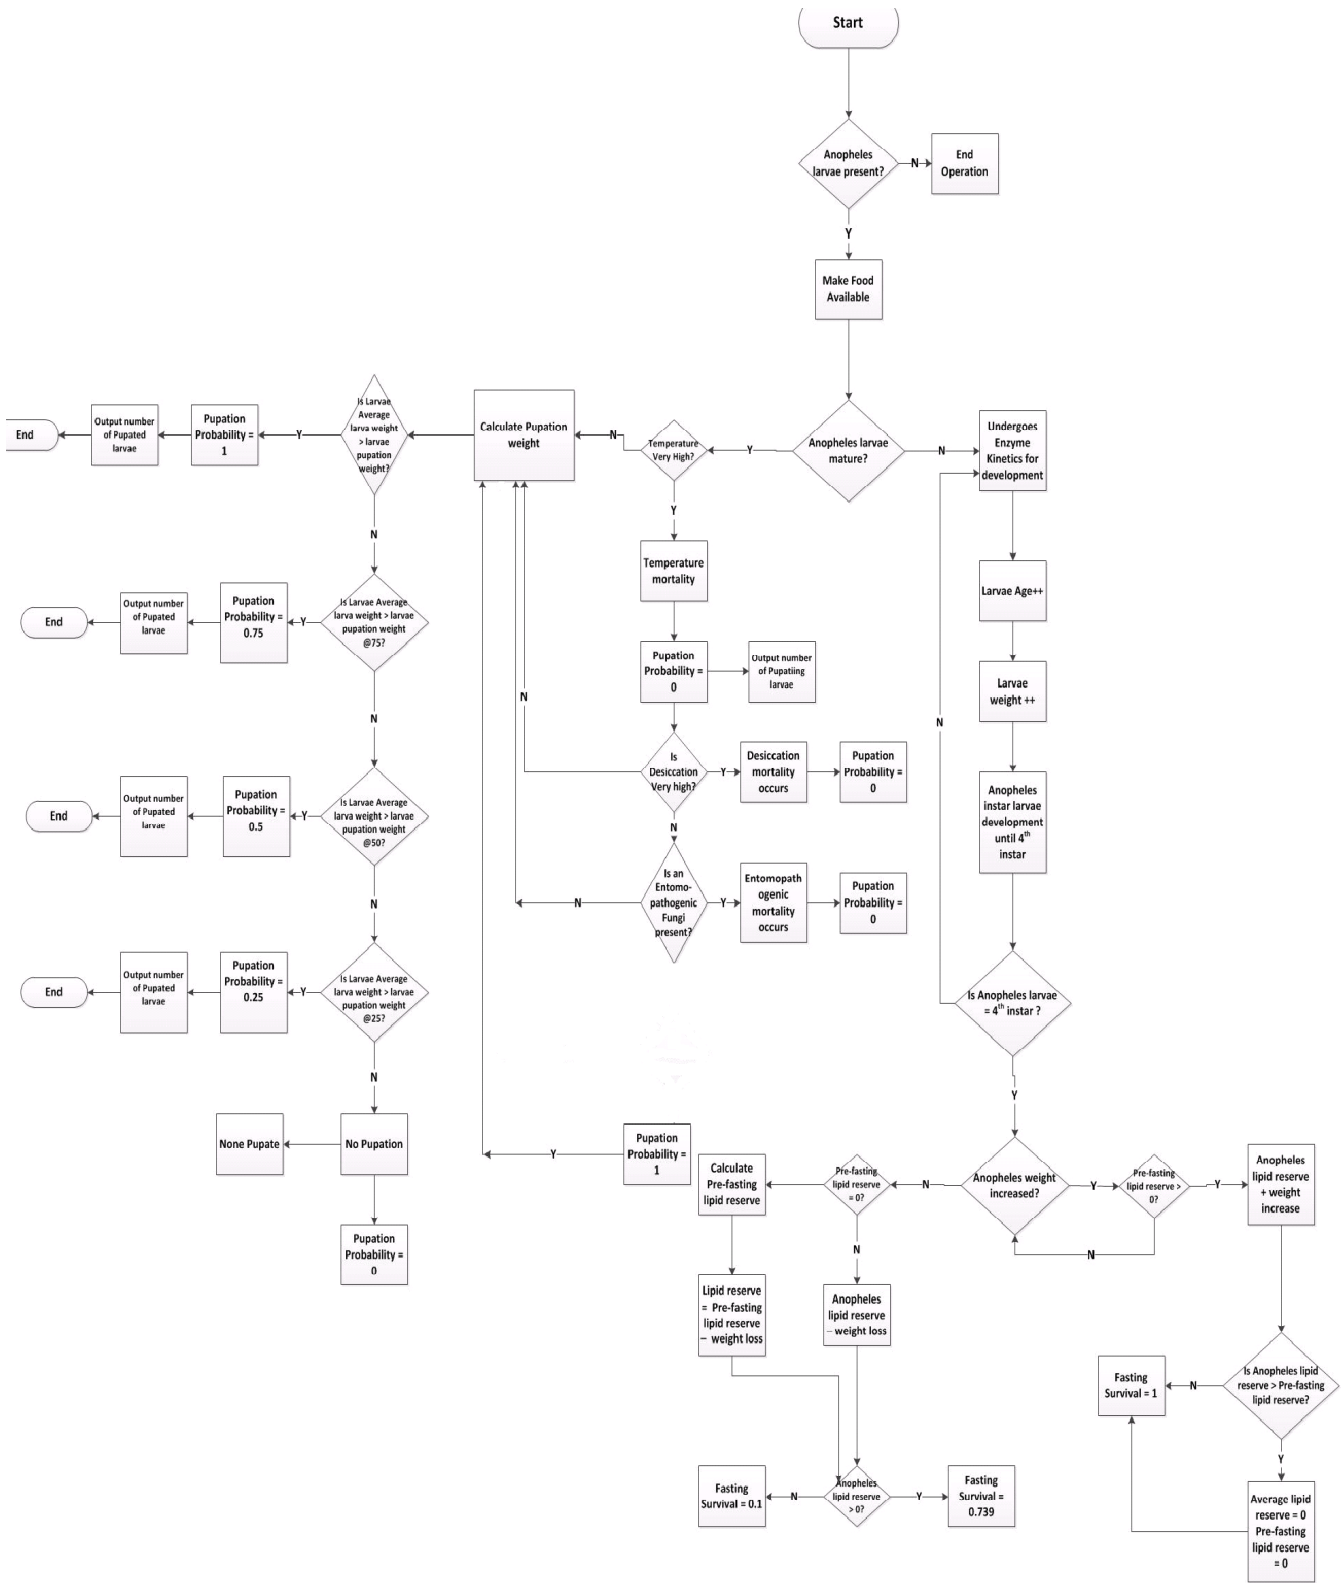

Fig S2
